# Supplementary material for: Biosynthesis of Gold Nanoparticles and Its Effect against Pseudomonas aeruginosa
Source: MDPI journal article supplement (doi:10.3390/molecules27248685), 2022-12-08
Supplement: s1 [file s1]

# Biosynthesis of Gold Nanoparticles and its Effect against *Pseudomonas aeruginosa*

Syed Ghazanfar Ali <sup>1</sup>, Mohammad Jalal <sup>1</sup>, Hilal Ahmad <sup>2</sup>, Khalid Umar <sup>3\*</sup>, Akil Ahmad <sup>4\*</sup>, Mohammed B. Alshammari <sup>4</sup> and Haris M Khan <sup>1</sup>

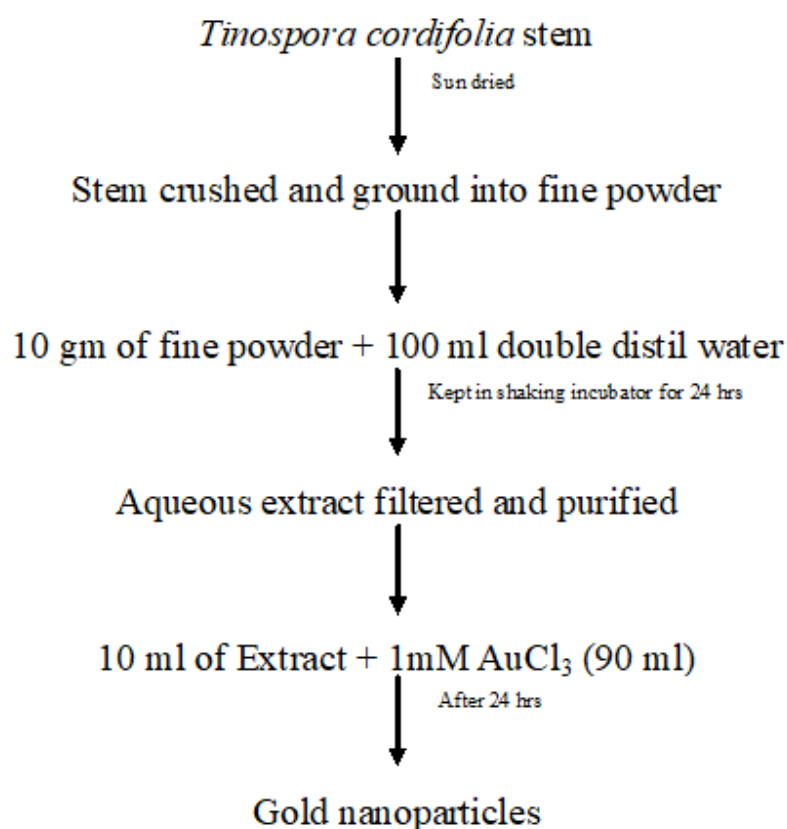

Figure S1. Flowchart for stepwise formation of gold nanoparticles
